# Supplementary material
Source: PubMed Central journal article supplement (PMC3436303)
Supplement: supp_M112.364596_jbc.M112.364596-1.pdf [file supp_M112.364596_jbc.M112.364596-1.pdf]

Supplemental Table 1: Oligonucleotide primers<sup>1</sup> for site-directed mutagenesis of canine RPE65

| Mutant | Forward primer <sup>2</sup>                            | Reverse primer <sup>2</sup>                            |
|--------|--------------------------------------------------------|--------------------------------------------------------|
| F61A   | TGAACCATTTTACCACCTGGCTGACGGACAAGCCCTTCTG               | CAGAAGGGCTTGTCCGTCAGCCAGGTGGTAAAAATGGTTCA              |
| F61L   | CTGAACCATTTTACCACCTGTTAGACGGACAAGCC                    | GGCTTGTCCGTCTAACAGGTGGTAAAAATGGTTTCAG                  |
| F61Y   | ATCTGAACCATTTTACCACCTGTATGACGGACAAGC                   | GCTTGTCCGTCATACAGGTGGTAAAAATGGTTTCAGAT                 |
| F61W   | GAACCATTTTACCACCTGTGGGACGGACAAGCCCTTCTGC               | GCAGAAGGGCTTGTCCGTCACAGGTGGTAAAAATGGTTTC               |
| F312L  | GGACCTCTTCCTTTAATCTCTTACATCATATCAATACTTACGAAG          | CTTCGTAAGTATTGATATGATGTAAGAGATTAAGGAAGAGGTCC           |
| F312W  | CAGGACCTCTTCCTTTAATCTCTGGCATCATATCAATACTTACGAAGA       | TCTTCGTAAGTATTGATATGATGCCAGAGATTAAGGAAGAGGTCTCG        |
| F312Y  | GTACAGGACCTCTTCCTTTAATCTCTACCATCATATCAATACTTA          | TAAGTATTGATATGATGGTAGAGATTAAGGAAGAGGTCTGTAC            |
| Y338A  | CTGCTGGAAAGGATTTGAATTCGTCTGCAATTACTTGTATTTAGCCAATTTA   | TAAATTGGCTAAATACAAGTAATTGGCGACGAATTCAAATCCTTTCCAGCAG   |
| Y338F  | CTGAAAGGATTTGAATTCGTCTTCAATTACTTGTATTTAGCCAATT         | AATTGGCTAAATACAAGTAATTGAAGACGAATTCAAATCCTTTCCAG        |
| Y338L  | CTGCTGGAAAGGATTTGAATTCGTCTTAAATTACTTGTATTTAGCCAATTTACG | CTGCTGGAAAGGATTTGAATTCGTCTTAAATTACTTGTATTTAGCCAATTTACG |
| Y338W  | TGCTGGAAAGGATTTGAATTCGTCTGGAATTACTTGTATTTAGCCAATTTAC   | GTAATTGGCTAAATACAAGTAATTCCAGACGAATTCAAATCCTTTCCAGCA    |
| F418A  | GCCTCGTCAAGCCTTTGAGGCTCCTCAAATCAACTATCAG               | CTGATAGTTGATTTGAGGAGCCTCAAAGGCTTGACGAGGC               |
| F418L  | CCTCGTCAAGCCTTTGAGTTACCTCAAATCAACTATCAG                | CTGATAGTTGATTTGAGGTAACCTCAAAGGC TTGACGAGG              |
| F418Y  | GGGCCTCGTCAAGCCTTTGAGTATCCTCAAATCAA                    | TTGATTTGAGGATACTCAAAGGCTTGACGAGGCC                     |
| F418W  | AGGGCCTCGTCAAGCCTTTGAGTGGCCTCAAATCAACTATC              | GATAGTTGATTTGAGGCCACTCAAAGGCTTGACGAGGCCCT              |
| F526A  | GGAGATTAACATCCCTGTCACCGCTCATGGACTGTTCAAAAAATC          | GGATTTTTTGAACAGTCCATGAGCGGTGACAGGGATGTTAATCTCC         |
| F526L  | GATTAACATCCCTGTCACCTTACATGGACTGTTCAAAAAATCC            | GGATTTTTTGAACAGTCCATGTAAGGTGACAGGGATGTTAATC            |
| F526W  | GAGATTAACATCCCTGTCACCTGGCATGGACTGTTCAAAAAATCCT         | AGGATTTTTTGAACAGTCCATGCCAGGTGACAGGGATGTTAATCTC         |
| F526Y  | GAGATTAACATCCCTGTCACCTATCATGGACTGTTCAAAAAA             | TTTTTTGAACAGTCCATGATAGGTGACAGGGATGTTAATCTC             |

<sup>1</sup>Predicted by QuikChange Primer Design Program (Stratagene division of Agilent Technologies)

<sup>2</sup>Primer sequences depicted in 5'-NNNN-3' orientation
