# Supplementary material
Source: PubMed Central journal article supplement (PMC3436303)
Supplement: supp_M112.364596_jbc.M112.364596-2.pdf [file supp_M112.364596_jbc.M112.364596-2.pdf]

Supplemental Table S2: RPE65 cavity residues<sup>1</sup>

|        |        |        |        |        |
|--------|--------|--------|--------|--------|
| LEU15  | PHE16  | LEU60  | PHE61  | THR101 |
| GLU102 | PHE103 | GLU127 | VAL128 | THR129 |
| ASN131 | LEU133 | VAL134 | THR147 | GLU148 |
| THR149 | ASN150 | ASN175 | GLY176 | ALA177 |
| THR178 | ILE192 | GLY193 | ASN194 | PHE196 |
| TYR204 | TYR239 | VAL240 | HIS241 | ILE259 |
| LEU261 | PHE264 | LEU265 | TRP268 | TYR275 |
| CYS278 | PHE279 | PHE312 | HIS313 | TRP331 |
| VAL337 | TYR338 | LEU341 | LEU346 | GLU417 |
| PHE418 | LEU437 | LEU439 | PHE442 | PRO444 |
| TYR466 | PRO467 | SER468 | GLU469 | VAL489 |
| VAL491 | ILE522 | PRO523 | VAL524 | THR525 |
| PHE526 | HIS527 |        |        |        |

<sup>1</sup>These residues were identified using the MarkUs Cavity Server (24).
