# Supplementary material
Source: PubMed Central journal article supplement (PMC3436303)

Supplemental Fig. S1

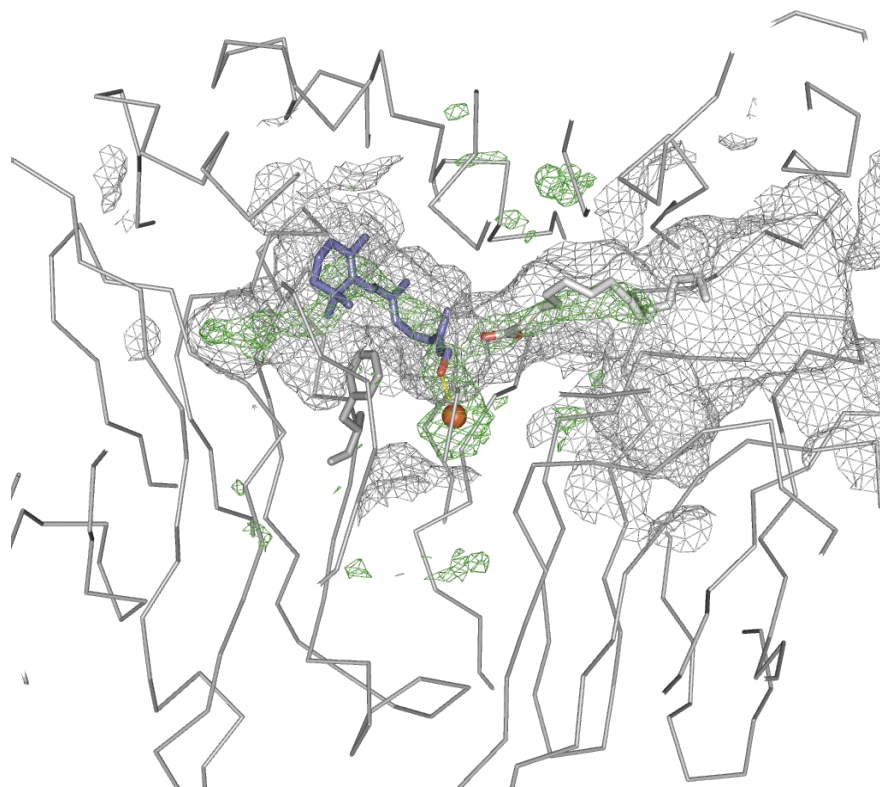

Supplement: supp_M112.364596_jbc.M112.364596-4.pdf [file supp_M112.364596_jbc.M112.364596-4.pdf]

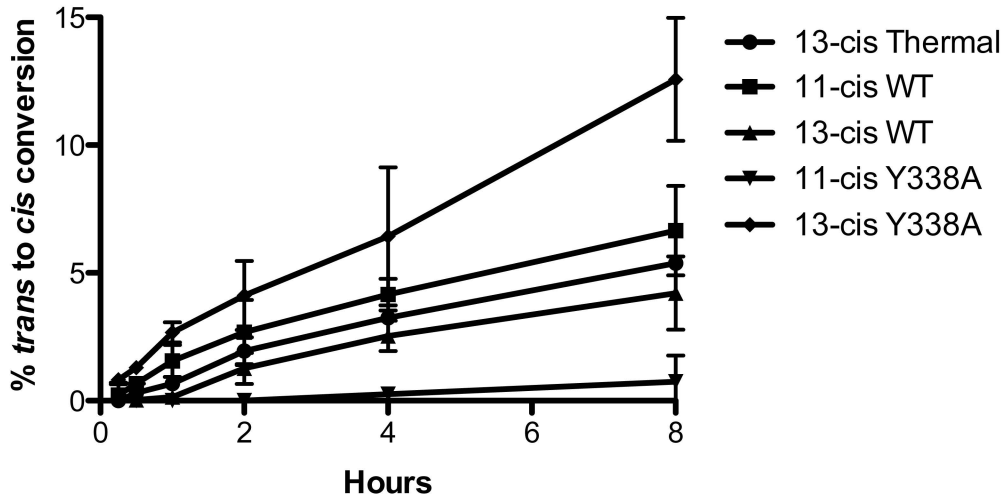

Supplement: supp_M112.364596_supplemental_Fig._S2.pdf [file supp_M112.364596_supplemental_Fig._S2.pdf]
